# Supplementary material for: STING-IRG1 inhibits liver metastasis of colorectal cancer by regulating the polarization of tumor-associated macrophages
Source: PubMed Central journal article supplement — iScience. 2023 Jul 13;26(8):107376. doi: 10.1016/j.isci.2023.107376 (PMC10405073; doi:10.1016/j.isci.2023.107376), 2023-07-13

iScience, Volume 26

## **Supplemental information**

### **STING-IRG1 inhibits liver metastasis of colorectal cancer by regulating the polarization of tumor-associated macrophages**

**Yixuan Liu, Qi Sun, Chengfei Zhang, Min Ding, Cheng Wang, Qian Zheng, Zhijie Ma, Haojun Xu, Guoren Zhou, Xiaoming Wang, Zhangjun Cheng, and Hongping Xia**

**Figure S1. Inducing M1 or M2 macrophages and Cell viability with STING agonist treatment, related to Figure 5.** (A) With or without DMXAA, RAW264.7 cells were induced into M1 or M2 macrophages with LPS/IFN- $\gamma$  or IL4, and qPCR was done to assess the mRNA levels of markers of RAW264.7 (*Arg1*, *Fizz1*, *IRG1*, *CXCL10*, *iNOS* and *TNF- $\alpha$* ). (B) Cell viability of colon cancer cells (MC38 and CT26) at different DMXAA treatment concentrations, CCK8 assay. (C) Cell viability of RAW264.7 cells at different DMXAA treatment concentrations, CCK8 assay.

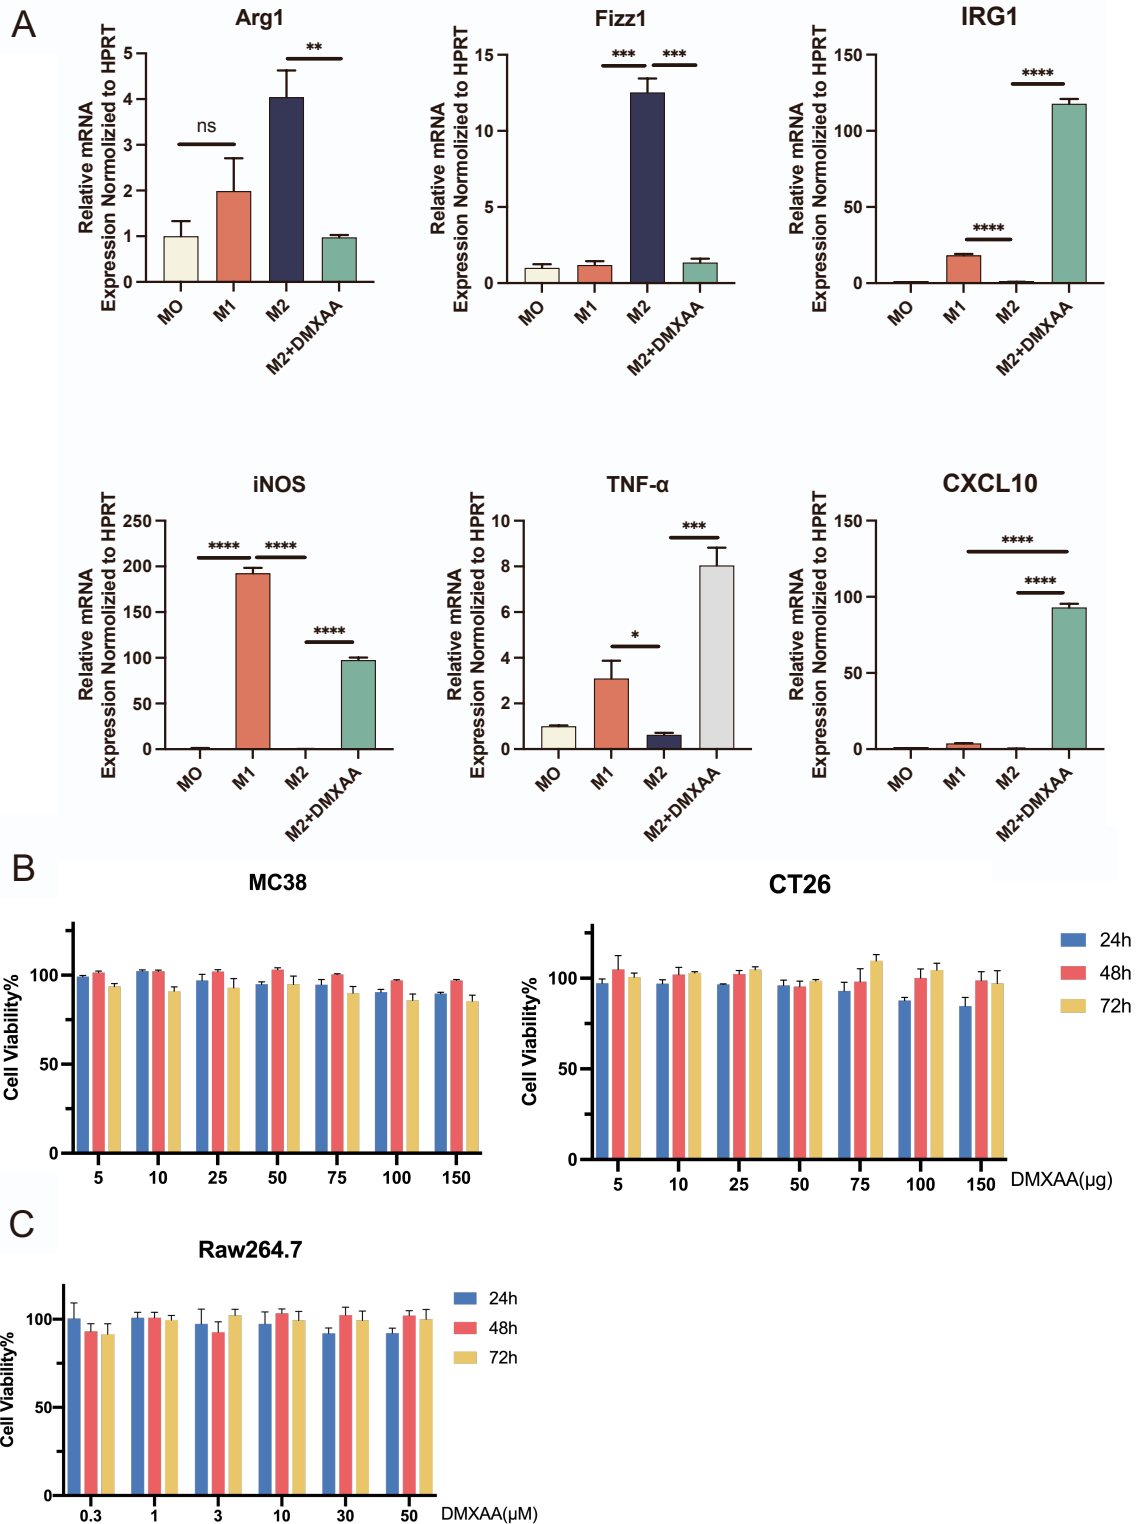

**Figure S2. T cell subtypes in peripheral blood and tumor tissues of mice with colorectal cancer liver metastases, related to Figure 3.** Flow cytometry to identify the proportion of cytotoxic T cells ( $CD45^+CD3^+CD8^+$ ), helper T cells ( $CD45^+CD3^+CD4^+$ ) and Treg cell subsets ( $CD4^+CD127^{low}CD25^{hi}$ ) in peripheral blood and tumor tissues of mice.

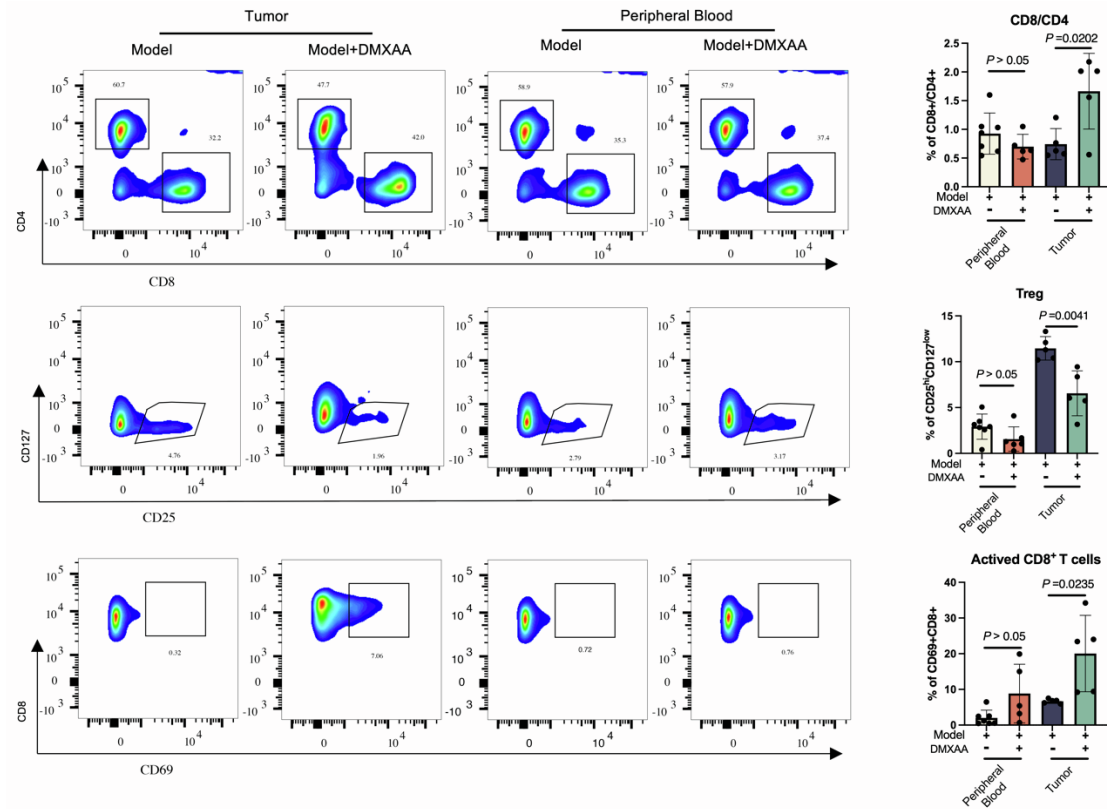

**Figure S3. Macrophage subtypes in liver metastases from colorectal cancer in mice, related to Figure 9.** Immunofluorescence analysis of liver metastatic tumor tissues in colorectal cancer liver metastasis mice treated with pbs or OI, CD206<sup>+</sup> (green), CD86<sup>+</sup> (red) and DAPI (blue). (B) Analysis of STING expression in primary CRC with metastasis tissues in CRC microarray profile(GSE41258). (C) MC38-luciferase cells were injected to construct a transfer model and treated with DMXAA (i.p.) (10mg/kg/3days) or PBS (i.p.) for three weeks. Western blot to detect the protein levels of IRG1 in mouse liver using GAPDH as the loading control.

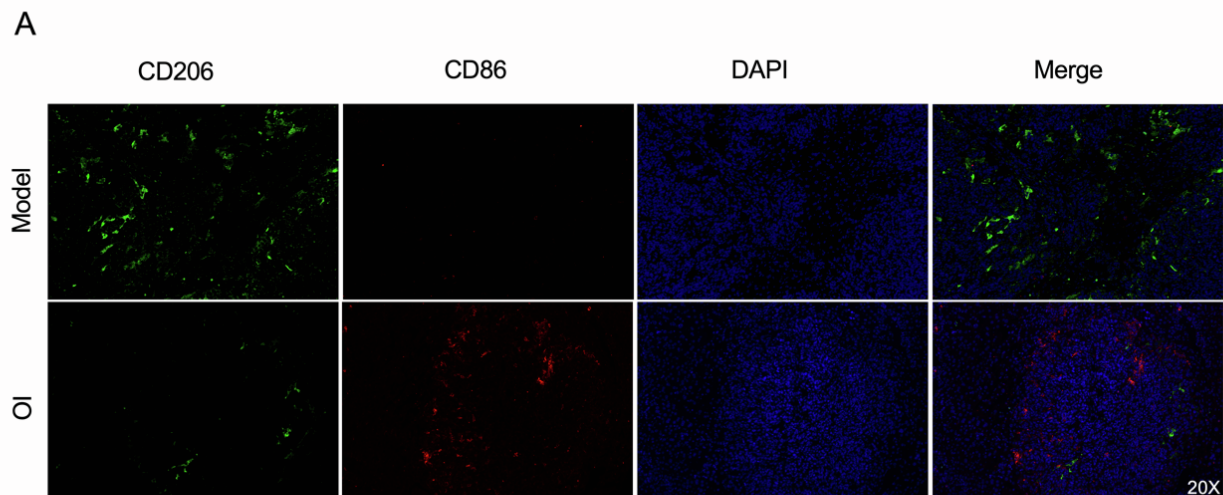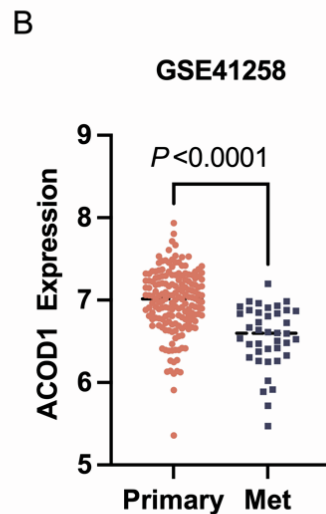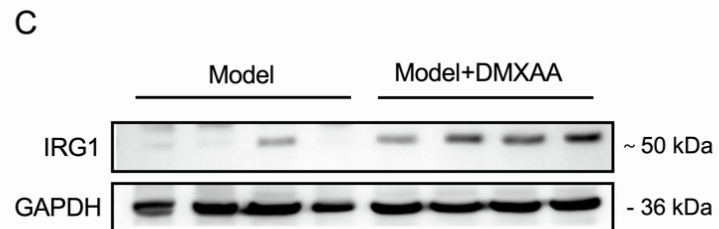

**Figure S4. Co-localization of IRG1 and STING in macrophages, related to Figure 7.** Macrophages were treated with PBS or DMXAA for 24h, and co-localization between IRG1 and STING was analyzed to determine the relationship between IRG1 and STING by immunofluorescence.

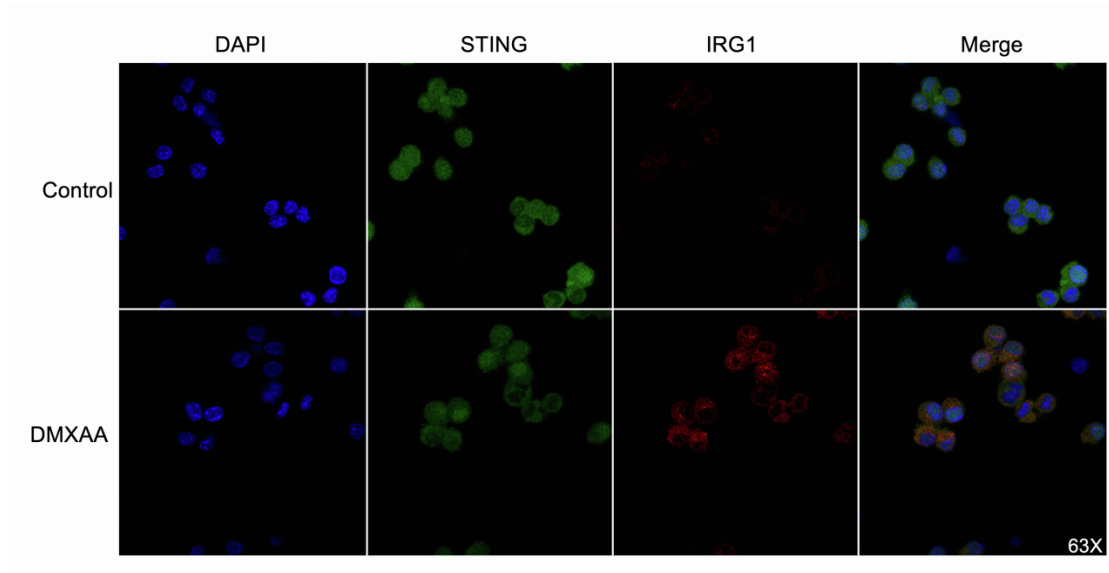

**Figure S5. STING inhibition of colorectal cancer liver metastasis was mediated by macrophages, related to Figure 3.** (A) After depletion of macrophages by clodronate liposomes(CLO), DMXAA (i.p) (10mg/kg/3day) was given for 3 weeks after the construction of colorectal cancer liver metastasis mice. Bioluminescence signal imaging of representative mice (left) and quantitation analyses of bioluminescence (right) were done following treatments, n≥5. (B) Flow cytometry analysis of macrophages in colorectal cancer liver metastasis tumor tissue and peripheral blood (CD45<sup>+</sup>CD11b<sup>+</sup>F4/80<sup>+</sup>).

A

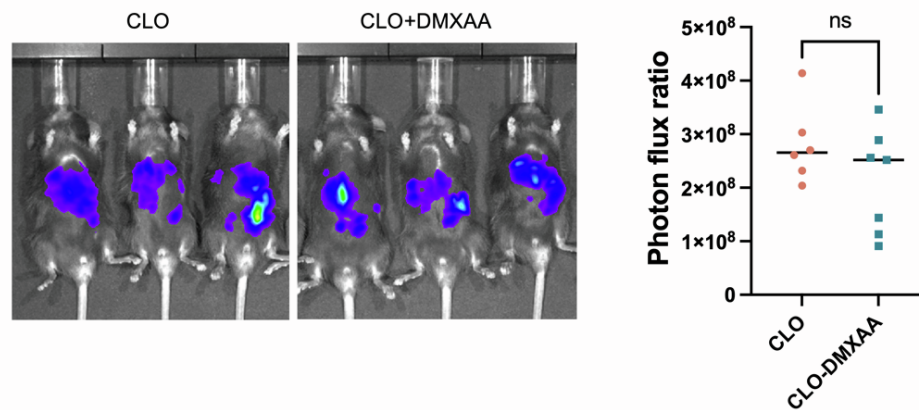

B

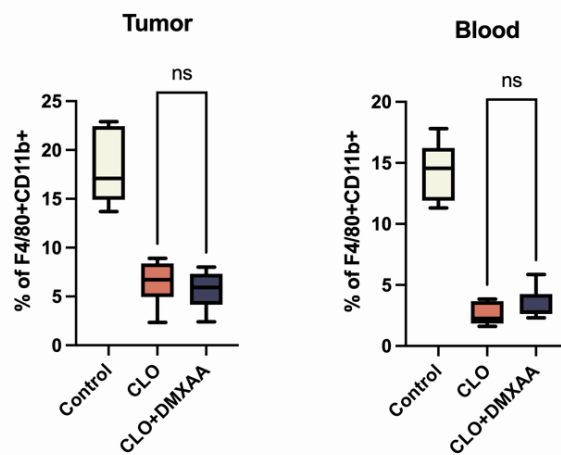

**Figure S6. Gating strategy for flow cytometry, related to Figure 2.** Gating strategy for flow cytometry of macrophages and T cells in tumor tissue. Immune cells were isolated from tumor tissues and flow cytometry was used to analyze the degree of infiltration of macrophages (A) and T cells (B) immune cells in tumor tissues to characterize the infiltration and activation of macrophages and T cells.

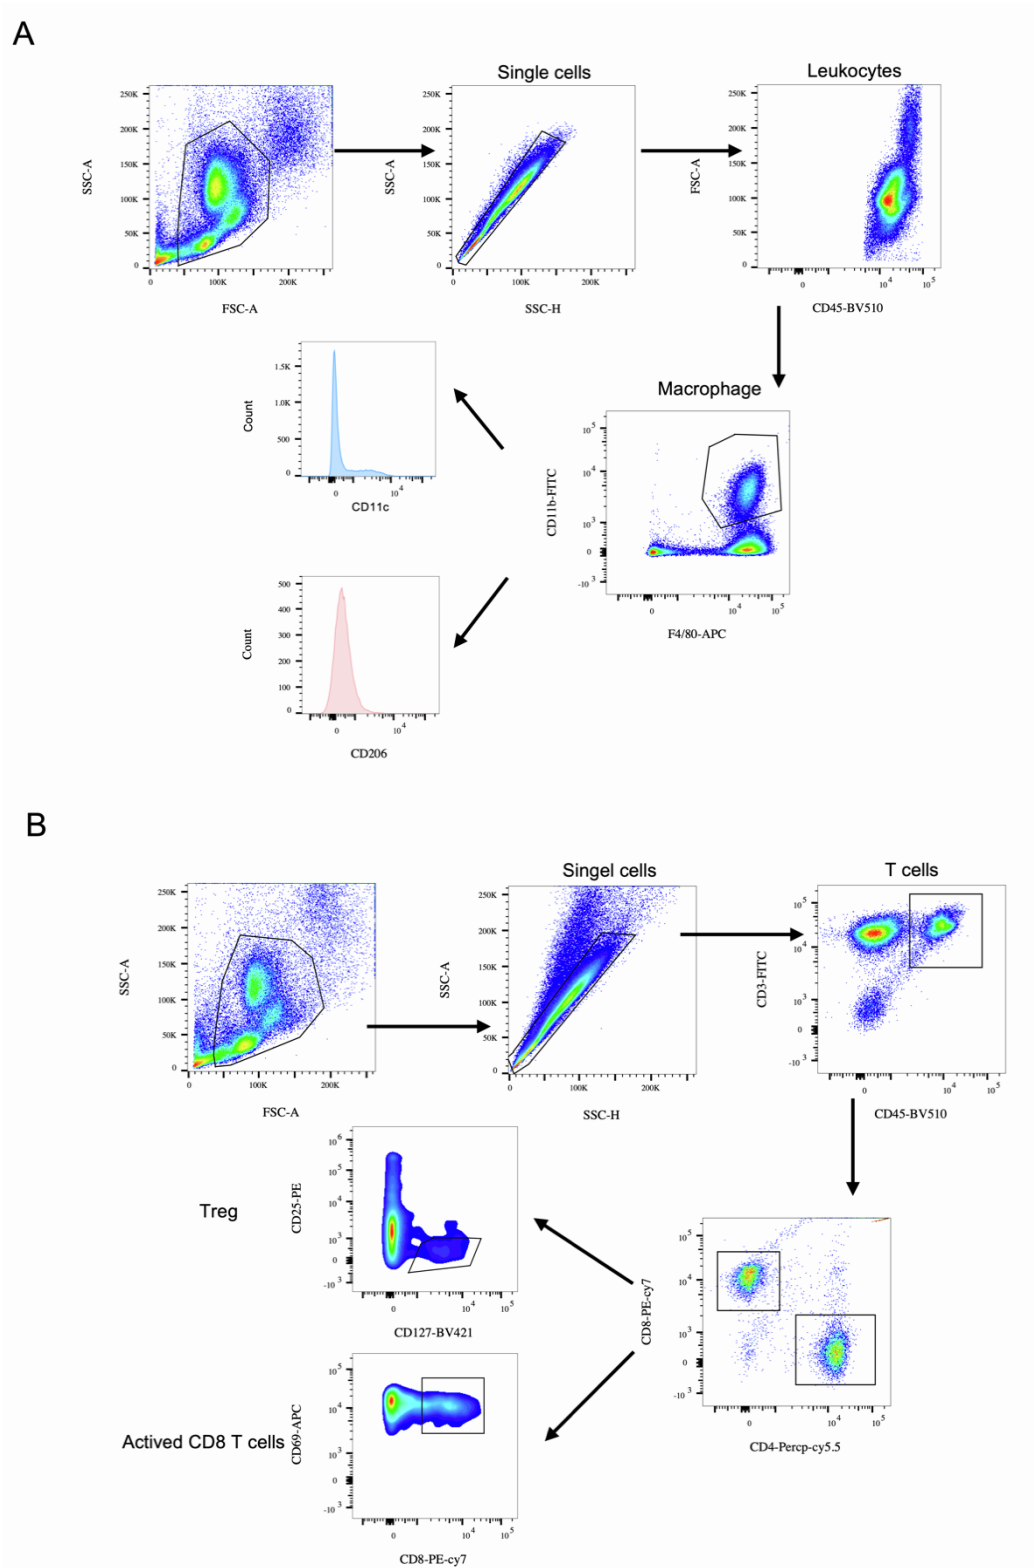

**Figure S7. Expression levels of STING in different cell lines, related to Figure 1.** Western blotting analysis of STING in CRC cell lines and normal intestinal epithelial cell lines.

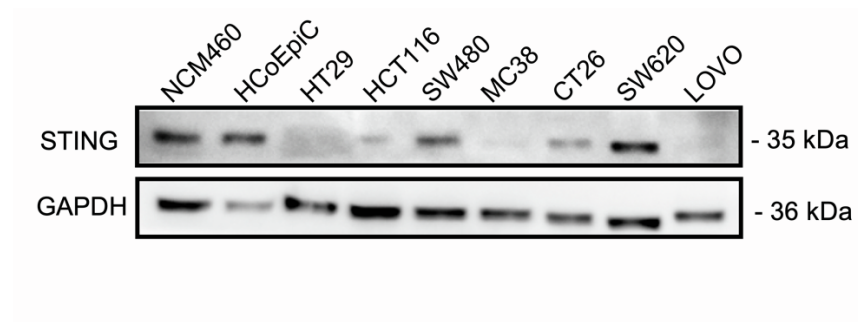

Supplement: mmc1.pdf [file mmc1.pdf]
